# Supplementary material for: A novel hydrate of α-cyclodextrin crystallised under high-pressure conditions
Source: Royal Society of Chemistry journal article supplement (doi:10.1039/c2ce26362a), 2012-01-01
Supplement: c2ce26362a.pdf [file c2ce26362a.pdf]

## Supplementary information for

# A novel hydrate of $\alpha$ -cyclodextrin crystallised under high-pressure conditions

Rubén Granero-García, Fernando J. Lahoz, Carsten Paulmann, Sofiane Saouane, and Francesca P. A. Fabbiani\*

Table 1 shows a comparison between hydrogen-bond distances and angles across forms I and Ib. The same donor atoms have been considered for comparison purposes but acceptor atoms can change. Differences are marked by an arrow at the end of the corresponding row.

In line with the hydrophobic effect, the interaction energies of H bonds between included water molecules and CD are usually weaker (up to 18%) than those involving non-included molecules and this is for example reflected in longer donor-acceptor distances.<sup>1</sup> This fact was known for form I and it is also confirmed for form Ib. In form I at 150 K mean hydrogen-acceptor distances where the donor is a water molecule located inside the cavity are 0.22 and 0.15 Å longer than if it is located outside. In form Ib at high pressure the equivalent mean donor-acceptor distances are 0.28 Å longer (there are not enough values to compare hydrogen-acceptor distances).

<sup>1</sup> H. C. Georg, K. Coutinho and S. Canuto, *Chem. Phys. Lett.*, 2005, **413**, 16-21

Table 1: Comparison between hydrogen-bond distances and angles across forms I and Ib

|                    |                     | form I at 150 K |                     |        |          |                  | Form I at 295 K <sup>a</sup> |                     |        |        |                  | form Ib at 0.65 GPa |                     |         |           |                  |   |
|--------------------|---------------------|-----------------|---------------------|--------|----------|------------------|------------------------------|---------------------|--------|--------|------------------|---------------------|---------------------|---------|-----------|------------------|---|
| D                  | H                   | A               | d(D-H) <sup>b</sup> | d(H-A) | d(D-A)   | $\theta$ (D-H-A) | A                            | d(D-H) <sup>c</sup> | d(H-A) | d(D-A) | $\theta$ (D-H-A) | A                   | d(D-H) <sup>b</sup> | d(H-A)  | d(D-A)    | $\theta$ (D-H-A) |   |
| O2.1               | H2O.1               | OW3.7#1         | 0.983               | 1.96   | 2.806(3) | 143              | OW3.7#1                      | 1.07                | 1.76   | 2.813  | 166              | OW3.7#1             | 0.983               | 1.88    | 2.77(2)   | 149              |   |
|                    |                     |                 |                     |        |          |                  |                              |                     |        |        |                  | OWD.7#2             | 0.983               | 2.28    | 2.83(5)   | 114              | ← |
| O3.1               | H3O.1               | O6.5#2          | 0.983               | 1.62   | 2.597(3) | 172              | O6.5#2                       | 0.98                | 1.67   | 2.606  | 158              | O6.5#2              | 0.983               | 1.78    | 2.589(18) | 137              |   |
|                    |                     |                 |                     |        |          |                  |                              |                     |        |        |                  | O2.1                | 0.983               | 2.48    | 2.884(18) | 104              | ← |
| O6A.1 <sup>d</sup> | H6OA.1 <sup>d</sup> | O6.3#3          | 0.983               | 1.85   | 2.784(3) | 157              | O6.3#3                       | 1.03                | 1.77   | 2.807  | 177              | O6.3#3              | 0.983               | 2.01    | 2.85(3)   | 142              |   |
| O6B.1 <sup>e</sup> | HO6B.1 <sup>e</sup> |                 |                     |        |          |                  |                              |                     |        |        |                  | OWD.7#3             | 0.983               | 1.99    | 2.79(5)   | 137              | ← |
| O2.2               | H2O.2               | OW4.7#2         | 0.983               | 1.71   | 2.682(3) | 171              | OW4.7#2                      | 0.93                | 1.77   | 2.692  | 169              | OW4.7#2             | 0.983               | 1.66    | 2.63(2)   | 170              |   |
| O3.2               | H3O.2               | O2.1            | 0.983               | 1.98   | 2.936(3) | 163              | O2.1                         | 0.86                | 2.09   | 2.949  | 175              | O2.1                | 0.983               | 1.91    | 2.853(19) | 161              |   |
| O6.2               | H6O.2               | O3.1#4          | 0.983               | 1.83   | 2.782(3) | 161              | O3.1#4                       | 0.91                | 1.89   | 2.785  | 171              | O3.1#4              | 0.983               | 1.97    | 2.750(18) | 135              |   |
| O2.3               | H2O.3               | OW2.7#5         | 0.983               | 1.76   | 2.715(3) | 164              | OW2.7#5                      | 0.86                | 1.85   | 2.718  | 179              | OW2.7#5             | 0.983               | 1.70    | 2.654(17) | 162              |   |
| O3.3               | H3O.3 <sup>f</sup>  | O2.2            | 0.983               | 2.00   | 2.974(3) | 169              | O2.2                         | 1.09                | 1.93   | 3.016  | 171              | O2.2                | 0.983               | 2.05    | 3.036(17) | 177              |   |
| O6.3               | H6O.3               | OW4.7           | 0.983               | 1.87   | 2.834(3) | 167              | OW4.7                        | 1.04                | 1.87   | 2.889  | 166              | OW4.7               | 0.983               | 2.12    | 3.06(2)   | 159              |   |
|                    |                     |                 |                     |        |          |                  |                              |                     |        |        |                  | O6.6#11             | 0.983               | 2.42    | 2.956(19) | 114              | ← |
| O2.4               | H2O.4               | O4.5            | 0.983               | 2.29   | 2.779(3) | 109              | O3.5                         | 0.91                | 2.85   | 3.367  | 118              | O4.5                | 0.983               | 2.28    | 2.775(19) | 110              | ← |
|                    |                     |                 |                     |        |          |                  |                              |                     |        |        |                  | O5.4#8              | 0.983               | 2.27    | 3.044(15) | 134              | ← |
| O3.4               | H3O.4               | O2.3            | 0.983               | 1.99   | 2.812(3) | 140              | O2.3                         | 0.99                | 1.86   | 2.816  | 161              | O2.3                | 0.983               | 1.95    | 2.784(16) | 141              |   |
| O6.4               | H6O.4               | O2.2#6          | 0.983               | 1.88   | 2.844(3) | 164              | O2.2#6                       | 0.94                | 1.95   | 2.850  | 160              | O2.2#6              | 0.983               | 1.81    | 2.782(19) | 169              |   |
| O2.5               | H2O.5               | O3.3#7          | 0.983               | 1.87   | 2.850(3) | 172              | O3.3#7                       | 0.97                | 1.95   | 2.902  | 169              | O3.3#7              | 0.983               | 2.18    | 2.869(18) | 126              |   |
| O3.5               | H3O.5               | O6.4#8          | 0.983               | 1.74   | 2.697(3) | 164              | O6.4#8                       | 0.96                | 1.77   | 2.716  | 169              | O6.4#8              | 0.983               | 1.70    | 2.671(17) | 169              |   |
| O6.5               | H6O.5               | OWA.7           | 0.983               | 1.84   | 2.749(4) | 153              | OWA.7                        | 0.85                | 1.92   | 2.773  | 176              | OWA.7               | 0.983               | 1.79    | 2.77(3)   | 173              |   |
| O2.6               | H2O.6               | O3.1            | 0.983               | 2.23   | 3.009(3) | 135              | O3.1                         | 0.97                | 2.14   | 3.021  | 150              | O3.1                | 0.983               | 1.98    | 2.957(18) | 175              |   |
| O3.6               | H3O.6               | O3.4#8          | 0.983               | 1.86   | 2.794(3) | 157              | O3.4#8                       | 0.93                | 1.89   | 2.788  | 163              | O3.4#8              | 0.983               | 1.79    | 2.743(16) | 163              |   |
| O6.6               | H6O.6               | OW1.7#9         | 0.983               | 1.93   | 2.861(3) | 158              | OW1.7#9                      | 0.94                | 1.97   | 2.897  | 169              | OW1.7#9             | 0.983               | 1.85    | 2.815(18) | 165              |   |
| OW1.7              | HW1.7               | OW2.7           | 0.983               | 1.84   | 2.821(3) | 176              | OW2.7                        | 1.02                | 1.84   | 2.857  | 176              | OW2.7               | 0.983               | 2.00    | 2.832(19) | 141              |   |
|                    | HW1'.7              | O2.6#10         | 0.983               | 1.79   | 2.722(3) | 157              | O2.6#10                      | 0.96                | 1.86   | 2.747  | 152              | O6.6#11             | 0.983               | 2.27    | 2.815(18) | 114              | ← |
| OW2.7              | HW2.7               | O2.5#7          | 0.983               | 1.74   | 2.712(3) | 170              | O2.5#7                       | 0.97                | 1.75   | 2.719  | 174              | O2.5#7              | 0.983               | 1.92    | 2.675(17) | 132              |   |
|                    | HW2'.7              | O3.6#7          | 0.983               | 1.79   | 2.761(3) | 169              | O3.6#7                       | 1.03                | 1.75   | 2.773  | 169              | O3.6#7              | 0.983               | 1.74    | 2.695(18) | 164              |   |
| OW3.7              | HW3.7               | O6.3            | 0.983               | 1.87   | 2.820(3) | 162              | O6.3                         | 0.91                | 1.93   | 2.831  | 171              | O6.3                | 0.983               | 1.79    | 2.77(2)   | 172              |   |
|                    | HW3'.7              | O5.6#11         | 0.983               | 1.96   | 2.945(3) | 175              | O6.6#11                      | 1.07                | 2.72   | 3.339  | 117              | OWD.7#12            | 0.983               | 1.74    | 2.71(5)   | 165              | ← |
|                    |                     |                 |                     |        |          |                  | O6B.1                        | 2.85                | 3.327  | 107    |                  |                     |                     |         |           |                  |   |
| OW4.7              | HW4.7               | O6.2#12         | 0.983               | 1.88   | 2.819(3) | 159              | O6.2#12                      | 0.87                | 1.98   | 2.840  | 169              | O6.2#12             | 0.983               | 2.12    | 2.74(2)   | 119              |   |
|                    | HW4'.7              | OW1.7           | 0.983               | 1.85   | 2.825(3) | 172              | OW1.7                        | 1.01                | 1.87   | 2.867  | 171              | OW1.7               | 0.983               | 2.14    | 2.99(3)   | 144              |   |
| OWA.7              | HWA.7               | O6.1            | 0.983               | 1.97   | 2.911(4) | 160              | O6.1A                        | 1.00                | 1.98   | 2.974  | 173              | OWD.7               | 0.983               | 2.01    | 2.41(5)   | 102              | ← |
|                    | HWA'.7              | OWB.7           | 0.983               | 1.92   | 2.884(4) | 166              | OWB.7                        | 0.89                | 2.04   | 2.915  | 167              | OWB.7               | 0.983               | 1.95    | 2.89(3)   | 158              |   |
| OWB.7              | HWB.7               | O3.5#8          | 0.983               | 2.37   | 3.065(4) | 127              | O3.5#8                       | 0.96                | 2.27   | 3.108  | 145              | O3.5#8              |                     |         | 2.95(3)   |                  |   |
|                    | HWB'.7              | O2.4#8          | 0.983               | 1.97   | 2.955(4) | 175              | O2.4#8                       | 0.98                | 2.05   | 2.991  | 160              | OWC.7#8             |                     |         | 2.28(5)   |                  | ← |
| OWC.7              |                     |                 |                     |        |          |                  |                              |                     |        |        | O2.4#8           |                     |                     | 2.72(5) |           | ←                |   |
|                    |                     |                 |                     |        |          |                  |                              |                     |        |        | O4.1             |                     |                     | 2.78(5) |           | ←                |   |
| OWD.7              |                     |                 |                     |        |          |                  |                              |                     |        |        | O3.2#6           |                     |                     | 2.80(5) |           | ←                |   |

Symmetry codes: #1 x+1/2, -y+1/2, -z; #2 x, y, z-1; #3 x+1/2, -y+1/2, -z+1; #4 x-1/2, -y+1/2, -z; #5 -x+1/2, -y, z-1/2; #6 x, y, z+1; #7 -x+3/2, -y, z+1/2; #8 -x+3/2, -y, z-1/2; #9 x+1, y, z; #10 x-1, y, z+1; #11 x-1, y, z; #12 x-1/2, -y+1/2, -z+1.

<sup>a</sup> From Table 3 in Klar *et al.*, *Acta Cryst.*, 1980, **B36**, 1154–1165. <sup>b</sup> Position of hydrogen atoms normalized to neutron values using the program PLATON (Spek, *Acta Cryst.*, 2009, **D65**, 148–155). <sup>c</sup> Position of hydrogen originally determined by neutron diffraction. <sup>d</sup> O6.1 and H6O.1 in form I at 150 K. <sup>e</sup> These atoms do not exist in form I at 150 K. <sup>f</sup> H3OB.3 in form I at 150 K.
